# Supplementary material
Source: PubMed Central journal article supplement (PMC3637429)
Supplement: NIHMS445440-supplement-Supp_Table_S1.pdf [file NIHMS445440-supplement-Supp_Table_S1.pdf]

Supplementary Table 1. Microarray analysis of FID2;GFAP-cre cortices at E13.5 (q<-.05, >|1.4| fold)

| ProbeID   | Symbol        | Qvalue.FDR-overall | Wt vs. TG RFC |                                                                                                                                                            |
|-----------|---------------|--------------------|---------------|------------------------------------------------------------------------------------------------------------------------------------------------------------|
| 102320338 | 0610007N19Rik | 0.04202554         | 1.52743939    |                                                                                                                                                            |
| 106760215 | 2700045K19Rik | 0.04202554         | 1.50396811    |                                                                                                                                                            |
| 106220139 | A530032J19Rik | 0.0474312          | -1.45595      |                                                                                                                                                            |
| 105550487 | Al452372      | 0.04202554         | 1.4714603     |                                                                                                                                                            |
| 5900066   | Apoc1         | 0.04202554         | -1.6206516    | apolipoprotein C-I lipoprotein metabolic process                                                                                                           |
| 4200671   | Apoe          | 0                  | -2.299558     | apolipoprotein E cholesterol metabolic process, response to oxidative stress, vasodilation                                                                 |
| 1740195   | Atf4          | 0.04202554         | 1.60224025    | activating transcription factor 4 GABABR1 binding in gliogenesis                                                                                           |
| 100380619 | B230105J10    | 0.0474312          | 1.44968936    |                                                                                                                                                            |
| 106130390 | B230375D24Rik | 0.0474312          | -1.4462207    |                                                                                                                                                            |
| 5080332   | B2m           | 0.04202554         | -1.8923021    | beta-2 microglobulin antigen processing and presentation of peptide antigen via MHC class I                                                                |
| 5390687   | C1qa          | 0.0474312          | -1.4050779    | complement component 1, q subcomponent, alpha polypeptide complement activation, classical pathway,innate immune response                                  |
| 5910292   | C1qb          | 0.04202554         | -1.7581334    | complement component 1, q subcomponent, beta polypeptide complement activation, classical pathway,innate immune response                                   |
| 5700131   | C1g           | 0.04202554         | -1.597425     | complement component 1, q subcomponent, C chain complement activation, classical pathway,innate immune response                                            |
| 460524    | Ccnd1         | 0.04202554         | -1.5669502    | cyclin D1 cyclin-dependent protein kinase regulator activity                                                                                               |
| 102680068 | Ccng1         | 0.0474312          | -1.4118357    | cyclin G1 cyclin-dependent protein kinase regulator activity                                                                                               |
| 105290301 | Cd68          | 0.0474312          | -1.4189278    | CD68 antigen lysosome, integral to membrane                                                                                                                |
| 4050088   | Cdkn1a        | 0.04202554         | -1.5432017    | cyclin-dependent kinase inhibitor 1A (P21) cyclin-dependent protein kinase inhibitor activity, regulation of progression through cell cycle                |
| 6110301   | Csnk1e        | 0.04202554         | -1.6040371    | casein kinase 1, epsilon circadian rhythm, protein kinase activity, Wnt receptor signaling pathway                                                         |
| 3990619   | Deadc1        | 0.0474312          | -1.4363153    | deaminase domain containing 1                                                                                                                              |
| 4200673   | Dlx2          | 0.04852202         | -1.4260951    | distal-less homeobox 2 positive regulation of transcription from RNA polymerase II promoter, cell differentiation                                          |
| 100780670 | Eda2r         | 0.04202554         | -1.8245879    | ectodysplasin A2 isoform receptor integral to membrane,cell differentiation, programmed cell death                                                         |
| 5550020   | Fcer1g        | 0.0474312          | -1.4008038    | Fc receptor, IgE, high affinity I, gamma polypeptide regulation of immune response                                                                         |
| 101940068 | Fxr2h         | 0.04202554         | 1.53683783    | fragile X mental retardation, autosomal homolog 2 KO mice have behavior, nervous system, reproductive, touch/vibrissae phenotype                           |
| 101500075 | Gli2          | 0.0474312          | 1.40578645    |                                                                                                                                                            |
| 2450131   | Hbb-b2        | 0.04202554         | 2.59067218    |                                                                                                                                                            |
| 5550372   | Lapln5        | 0.04202554         | -1.8512068    | lysosomal-associated protein transmembrane 5 lysosome, integral to membrane, transport                                                                     |
| 106760253 | LOC268393     | 0.04202554         | 2.98829362    |                                                                                                                                                            |
| 106520465 | LOC329076     | 0.04202554         | 1.41251731    |                                                                                                                                                            |
| 106770333 | LOC385505     | 0.0474312          | 1.48134292    |                                                                                                                                                            |
| 6770717   | Lyzs          | 0.04202554         | -1.428144     | lysozyme lysozyme activity                                                                                                                                 |
| 2120390   | Manbal        | 0.04202554         | -1.4273994    | mannosidase, beta A, lysosomal-like integral to membrane                                                                                                   |
| 60204     | Msr2          | 0.04202554         | -2.0364481    | macrophage scavenger receptor 2 receptor activity, extracellular space                                                                                     |
| 5340592   | Pdrg1         | 0.04202554         | -1.7430522    | p53 and DNA damage regulated 1 protein folding                                                                                                             |
| 107040497 | Pmm1          | 0                  | -20.093884    | protamine 1 spermatid development, nuclear organization and biogenesis                                                                                     |
| 103850204 | Pscd4         | 0.04202554         | -1.4487312    | pleckstrin homology, Sec7 and coiled/coil domains 4 regulation of ARF protein signal transduction                                                          |
| 103610551 | Rpl30         | 0.04202554         | 1.80914398    |                                                                                                                                                            |
| 101940008 | Serpine2      | 0.04852202         | -1.4203287    | serine (or cysteine) peptidase inhibitor, clade E, member 2 serine-type endopeptidase inhibitor activity, cell differentiation, nervous system development |
| 1240142   | Tomm22        | 0.04202554         | 1.68256586    |                                                                                                                                                            |
| 6290358   | Trem2         | 0.04202554         | -1.4144516    | triggering receptor expressed on myeloid cells 2 transmembrane receptor activity                                                                           |

note: Id2 is not identified since the transgene is human ID2
