# Supplementary material
Source: PubMed Central journal article supplement (PMC3637429)

# Yun, Sup. 1

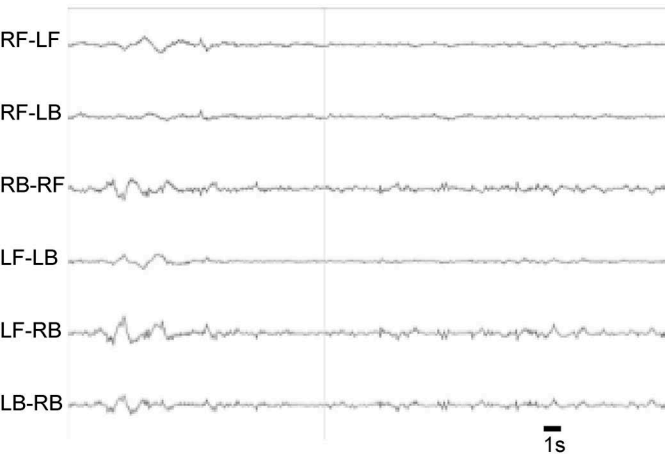

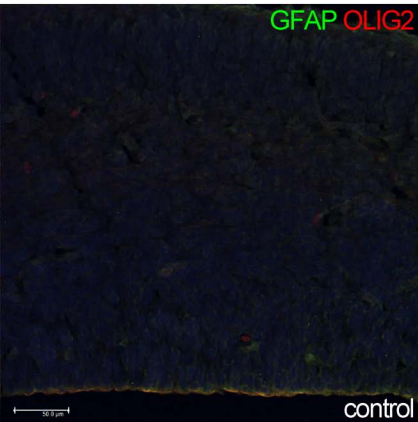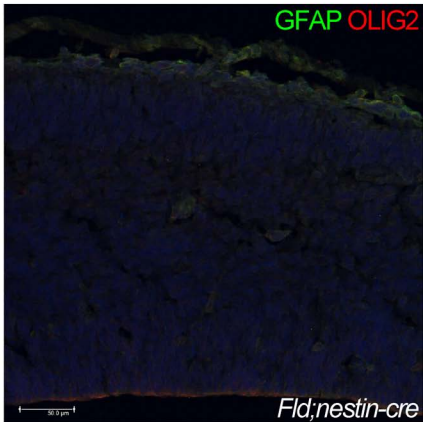

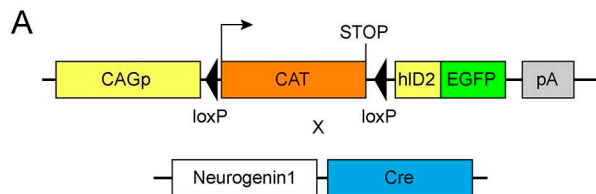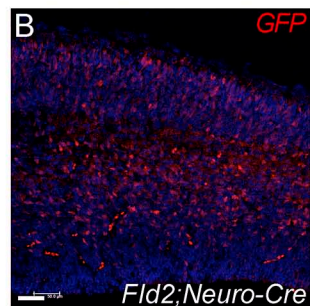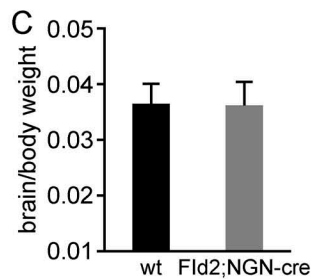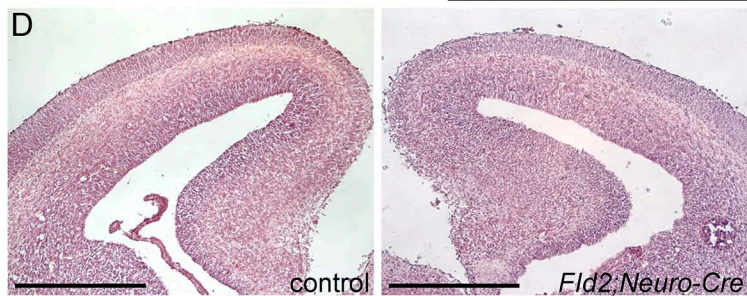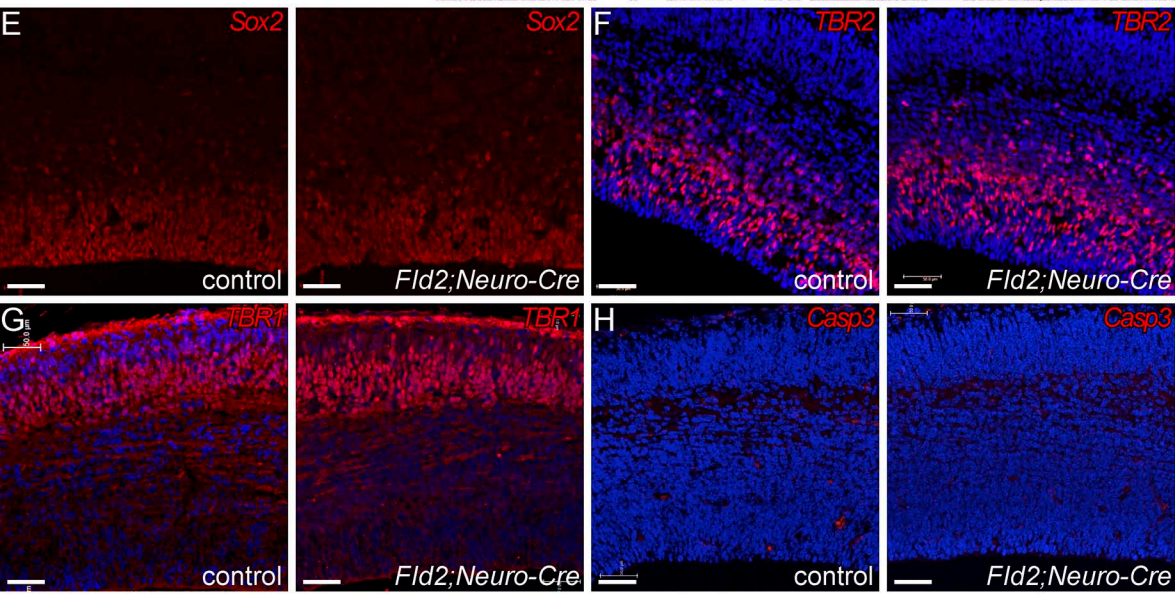

# Yun, Sup. 4

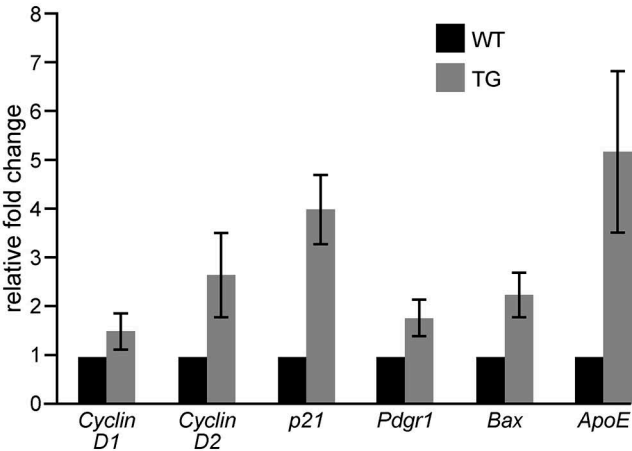

# Yun, Sup. 5

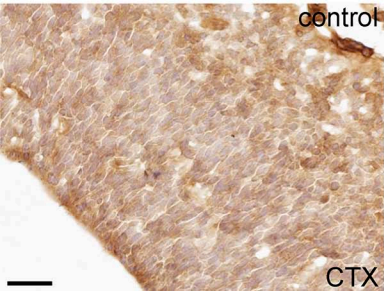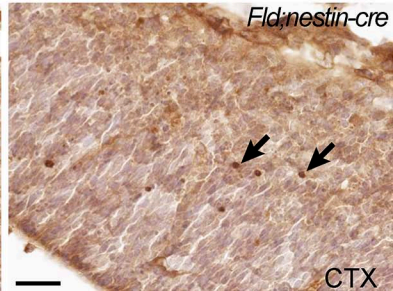

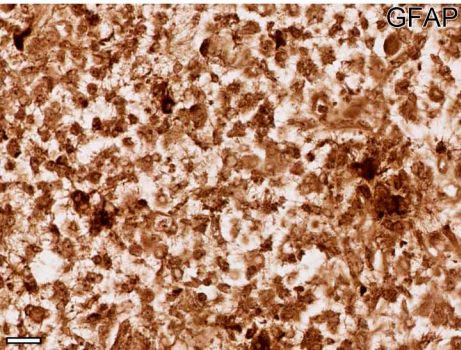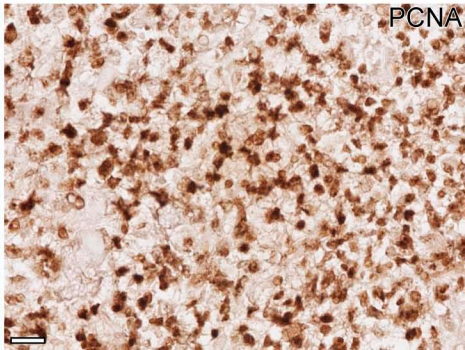

Supplement: NIHMS445440-supplement-Supp_Fig_S1-S6.pdf [file NIHMS445440-supplement-Supp_Fig_S1-S6.pdf]
